# Supplementary material
Source: publisher figshare collection journal article supplement (https://acs.figshare.com/ndownloader/files/16610375)
Supplement: Supplementary file 1 [file 16610375]

Compound	SMILES
1	C=C(C)[C@]1(C2)[C@@H]3[C@]4([H])[C@H]5[C@](CO)(O5)[C@@H](O)[C@@]6(O)[C@]([C@]7([H])[C@H](C)[C@@H]6OC(C8=CC=CC=C8)=O)([H])[C@]4(O[C@]([C@@H](CCCCCC[C@H]7C)O)(O1)O3)[C@@H]2COC(C9=CC=CC=C9)=O
2	C=C(C)[C@]1(C2)[C@@H]3[C@]4([H])[C@H]5[C@](COC(C)=O)(O5)[C@@H](OC(C)=O)[C@@]6(O)[C@]([C@@]([H])([C@@H3])[C@@H2][C@@H]6OC(C7=CC=CC=C7)=O)([H])[C@]4(O[C@]([C@@H](CCCC)OC(C)=O)(O1)O3)[C@@H]2COC(C8=CC=CC=C8)=O
3	C=C(C)[C@]1(C2)[C@@H]3[C@]4([H])[C@H]5[C@](COC(C6=CC=CC=C6)=O)(O5)[C@@H](O)[C@@]7(O)[C@]([C@]8([H])[C@H](C)[C@@H]7OC(C9=CC=CC=C9)=O)([H])[C@]4(O[C@]([C@@H](CCCCCC[C@H]8C)OC(C%10=CC=CC=C%10)=O)(O1)O3)[C@@H]2COC(C%11=CC=CC=C%11)=O
4	C=C(C)[C@]1(C2)[C@@H]3[C@]4([H])[C@H]5[C@](CO)(O5)[C@@H](O)[C@@]6(O)[C@]([C@]7([H])[C@H](C)[C@@H]6O)([H])[C@]4(O[C@]([C@@H](CCCCCC[C@H]7C)O)(O1)O3)[C@@H]2CO
5	C=C(C)[C@]1(C2)[C@@H]3[C@]4([H])[C@H]5[C@](CO)(O5)[C@@H](O)[C@@]6(O)[C@]([C@]7([H])[C@H](C)[C@@H]6O)([H])[C@]4(O[C@]([C@@H](CCCCCC[C@H]7C)O)(O1)O3)[C@@H]2COC(C8=CC=CC=C8)=O
6	CC(C)[C@]1(C2)[C@@H]3[C@]4([H])[C@H]5[C@](CO)(O5)[C@@H](O)[C@@]6(O)[C@]([C@]7([H])[C@H](C)[C@@H]6OC(C8=CC=CC=C8)=O)([H])[C@]4(O[C@]([C@@H](CCCCCC[C@H]7C)O)(O1)O3)[C@@H]2COC(C9=CC=CC=C9)=O
9a	C=C(C)[C@]1(C2)[C@@H]3[C@]4([H])[C@H]5[C@](CO)(O5)[C@@H](O)[C@@]6(O)[C@]([C@]7([H])[C@H](C)[C@@H]6OC(C8=CC=CC=C8)=O)([H])[C@]4(O[C@](C(CCCCCC[C@H]7C)=O)(O1)O3)[C@@H]2COC(C9=CC=CC=C9)=O
9b	C=C(C)[C@]1(C2)[C@@H]3[C@]4([H])[C@H]5[C@](CO)(O5)[C@@H](O)[C@@]6(O)[C@]([C@]7([H])[C@H](C)[C@@H]6OC(C8=CC=CC=C8)=O)([H])[C@]4(O[C@]([C@@H](CCCCCC[C@H]7C)OC(C)=O)(O1)O3)[C@@H]2COC(C9=CC=CC=C9)=O
9c	C=C(C)[C@]1(C2)[C@@H]3[C@]4([H])[C@H]5[C@](CO)(O5)[C@@H](O)[C@@]6(O)[C@]([C@]7([H])[C@H](C)[C@@H]6OC(C8=CC=CC=C8)=O)([H])[C@]4(O[C@]([C@@H](OC(/C(C)=C/C)=O)CCCCCC[C@H]7C)(O1)O3)[C@@H]2COC(C9=CC=CC=C9)=O
9d	C=C(C)[C@]1(C2)[C@@H]3[C@]4([H])[C@H]5[C@](CO)(O5)[C@@H](O)[C@@]6(O)[C@]([C@]7([H])[C@H](C)[C@@H]6OC(C8=CC=CC=C8)=O)([H])[C@]4(O[C@]([C@@H](CCCCCC[C@H]7C)OC(C9=CC=CC=C9)=O)(O1)O3)[C@@H]2COC(C%10=CC=CC=C%10)=O
9e	C=C(C)[C@]1(C2)[C@@H]3[C@]4([H])[C@H]5[C@](CO)(O5)[C@@H](O)[C@@]6(O)[C@]([C@]7([H])[C@H](C)[C@@H]6OC(C8=CC=CC=C8)=O)([H])[C@]4(O[C@]([C@@H](OC(C9=CC=C(OC)C=C9)=O)CCCCCC[C@H]7C)(O1)O3)[C@@H]2COC(C%10=CC=CC=C%10)=O
9f	C=C(C)[C@]1(C2)[C@@H]3[C@]4([H])[C@H]5[C@](CO)(O5)[C@@H](O)[C@@]6(O)[C@]([C@]7([H])[C@H](C)[C@@H]6OC(C8=CC=CC=C8)=O)([H])[C@]4(O[C@]([C@@H](OC(C9=CC=C([N+]([O-])=O)C=C9)=O)CCCCCC[C@H]7C)(O1)O3)[C@@H]2COC(C%10=CC=CC=C%10)=O
9g	C=C(C)[C@]1(C2)[C@@H]3[C@]4([H])[C@H]5[C@](CO)(O5)[C@@H](O)[C@@]6(O)[C@]([C@]7([H])[C@H](C)[C@@H]6OC(C8=CC=CC=C8)=O)([H])[C@]4(O[C@]([C@@H](OC(/C=C/C9=CC=CC=C9)=O)CCCCCC[C@H]7C)(O1)O3)[C@@H]2COC(C%10=CC=CC=C%10)=O
9h	C=C(C)[C@]1(C2)[C@@H]3[C@]4([H])[C@H]5[C@](CO)(O5)[C@@H](O)[C@@]6(O)[C@]([C@]7([H])[C@H](C)[C@@H]6OC(C8=CC=CC=C8)=O)([H])[C@]4(O[C@]([C@@H](OC(C9=CC=C%10C(C=CC=C%10)=C9)=O)CCCCCC[C@H]7C)(O1)O3)[C@@H]2COC(C%11=CC=CC=C%11)=O
13a	C=C(C)[C@]1(C2)[C@@H]3[C@]4([H])[C@H]5[C@](CO)(O5)[C@@H](O)[C@@]6(O)[C@]([C@]7([H])[C@H](C)[C@@H]6OC(C8=CC=C(OC)C=C8)=O)([H])[C@]4(O[C@]([C@@H](CCCCCC[C@H]7C)O)(O1)O3)[C@@H]2COC(C9=CC=CC=C9)=O
13b	C=C(C)[C@]1(C2)[C@@H]3[C@]4([H])[C@H]5[C@](CO)(O5)[C@@H](O)[C@@]6(O)[C@]([C@]7([H])[C@H](C)[C@@H]6OC(C8=CC=C([N+]([O-])=O)C=C8)=O)([H])[C@]4(O[C@]([C@@H](CCCCCC[C@H]7C)O)(O1)O3)[C@@H]2COC(C9=CC=CC=C9)=O
13c	C=C(C)[C@]1(C2)[C@@H]3[C@]4([H])[C@H]5[C@](CO)(O5)[C@@H](O)[C@@]6(O)[C@]([C@]7([H])[C@H](C)[C@@H]6OC(/C=C/C8=CC=CC=C8)=O)([H])[C@]4(O[C@]([C@@H](CCCCCC[C@H]7C)O)(O1)O3)[C@@H]2COC(C9=CC=CC=C9)=O
13d	C=C(C)[C@]1(C2)[C@@H]3[C@]4([H])[C@H]5[C@](CO)(O5)[C@@H](O)[C@@]6(O)[C@]([C@]7([H])[C@H](C)[C@@H]6OC(C8=CC9=C(C=CC=C9)C=C8)=O)([H])[C@]4(O[C@]([C@@H](CCCCCC[C@H]7C)O)(O1)O3)[C@@H]2COC(C%10=CC=CC=C%10)=O
13e	C=C(C)[C@]1(C2)[C@@H]3[C@]4([H])[C@H]5[C@](CO)(O5)[C@@H](O)[C@@]6(O)[C@]([C@]7([H])[C@H](C)[C@@H]6OC(C8=CC=NC=C8)=O)([H])[C@]4(O[C@]([C@@H](CCCCCC[C@H]7C)O)(O1)O3)[C@@H]2COC(C9=CC=CC=C9)=O
15a	C=C(C)[C@]1(C2)[C@@H]3[C@]4([H])[C@H]5[C@](CO)(O5)[C@@H](OC(C6=CC=CC=C6)=O)[C@@]7(O)[C@]([C@]8([H])[C@H](C)[C@@H]7OC(C9=CC=CC=C9)=O)([H])[C@]4(O[C@]([C@@H](CCCCCC[C@H]8C)O)(O1)O3)[C@@H]2COC(C%10=CC=CC=C%10)=O
15b	C=C(C)[C@]1(C2)[C@@H]3[C@]4([H])[C@H]5[C@](CO)(O5)C([C@@]6(O)[C@]([C@]7([H])[C@H](C)[C@@H]6OC(C8=CC=CC=C8)=O)([H])[C@]4(O[C@]([C@@H](CCCCCC[C@H]7C)O)(O1)O3)[C@@H]2COC(C9=CC=CC=C9)=O)=O
18	C=C(C)[C@]1(C2)[C@@H]3[C@]4([H])[C@H]5[C@H](O5)[C@@H](OC(C)=O)[C@@]6(O)[C@]([C@]7([H])[C@H](C)[C@@H]6OC(C8=CC=CC=C8)=O)([H])[C@]4(O[C@]([C@@H](CCCCCC[C@H]7C)O)(O1)O3)[C@@H]2COC(C9=CC=CC=C9)=O
19a	C=C(C)[C@]1(C2)[C@@H]3[C@]4([H])[C@H]5[C@](COC(C)=O)(O5)[C@@H](O)[C@@]6(O)[C@]([C@]7([H])[C@H](C)[C@@H]6O)([H])[C@]4(O[C@]([C@@H](CCCCCC[C@H]7C)O)(O1)O3)[C@@H]2COC(C8=CC=CC=C8)=O
19b	C=C(C)[C@]1(C2)[C@@H]3[C@]4([H])[C@H]5[C@](COC(C6=CC=CC=C6)=O)(O5)[C@@H](O)[C@@]7(O)[C@]([C@]8([H])[C@H](C)[C@@H]7O)([H])[C@]4(O[C@]([C@@H](CCCCCC[C@H]8C)O)(O1)O3)[C@@H]2COC(C9=CC=CC=C9)=O
19c	C=C(C)[C@]1(C2)[C@@H]3[C@]4([H])[C@H]5[C@](COC(CCC(O)=O)=O)(O5)[C@@H](O)[C@@]6(O)[C@]([C@]7([H])[C@H](C)[C@@H]6O)([H])[C@]4(O[C@]([C@@H](CCCCCC[C@H]7C)O)(O1)O3)[C@@H]2COC(C8=CC=CC=C8)=O
19d	C=C(C)[C@]1(C2)[C@@H]3[C@]4([H])[C@H]5[C@](COC(C(C)(C)CC(O)=O)=O)(O5)[C@@H](O)[C@@]6(O)[C@]([C@]7([H])[C@H](C)[C@@H]6O)([H])[C@]4(O[C@]([C@@H](CCCCCC[C@H]7C)O)(O1)O3)[C@@H]2COC(C8=CC=CC=C8)=O
19e	C=C(C)[C@]1(C2)[C@@H]3[C@]4([H])[C@H]5[C@](COC(CC(C)(C)C(O)=O)=O)(O5)[C@@H](O)[C@@]6(O)[C@]([C@]7([H])[C@H](C)[C@@H]6O)([H])[C@]4(O[C@]([C@@H](CCCCCC[C@H]7C)O)(O1)O3)[C@@H]2COC(C8=CC=CC=C8)=O
19f	C=C(C)[C@]1(C2)[C@@H]3[C@]4([H])[C@H]5[C@](COC(C(O6)(C7(C)C)CC[C@]7(C)C6=O)=O)(O5)[C@@H](O)[C@@]8(O)[C@]([C@]9([H])[C@H](C)[C@@H]8O)([H])[C@]4(O[C@]([C@@H](CCCCCC[C@H]9C)O)(O1)O3)[C@@H]2COC(C%10=CC=CC=C%10)=O
19g	C=C(C)[C@]1(C2)[C@@H]3[C@]4([H])[C@H]5[C@](COC(C6(C)COC(C)(C)OC6)=O)(O5)[C@H2][C@H]7[C@]([C@]8([H])[C@H](C)[C@H2]7)([H])[C@]4(O[C@]([C@@H](CCCCCC[C@H]8C)O)(O1)O3)[C@@H]2COC(C9=CC=CC=C9)=O
19h	C=C(C)[C@]1(C2)[C@@H]3[C@]4([H])[C@H]5[C@](COC(/C=C/C6=CC=C(OC)C=C6)=O)(O5)[C@@H](O)[C@@]7(O)[C@]([C@]8([H])[C@H](C)[C@@H]7O)([H])[C@]4(O[C@]([C@@H](CCCCCC[C@H]8C)O)(O1)O3)[C@@H]2COC(C9=CC=CC=C9)=O
